# Supplementary material for: Covalent Modification of Bacteriophage T4 DNA Inhibits CRISPR-Cas9
Source: PubMed Central journal article supplement — mBio. 2015 Jun 16;6(3):e00648-15. doi: 10.1128/mBio.00648-15 (PMC4471564; doi:10.1128/mbio.00648-15), 2015-06-16
Supplement: mbo003152354st1.pdf [file mbo003152354st1.pdf]

**Table S1** Genotypes of bacteria and bacteriophages used in this study

| <b>Phage<br/>(Nomenclature<br/>used in this<br/>paper)</b> | <b>Alternative/<br/>historical<br/>name</b> | <b>Genotype</b>                              |
|------------------------------------------------------------|---------------------------------------------|----------------------------------------------|
| T4(Glc-HMC)                                                | T4                                          | wild type                                    |
| T4(HMC)                                                    | T4147                                       | $\alpha$ gt1, $\beta$ gt7                    |
| T4(C)                                                      | T4GT7                                       | amC87g42, amE51g56, rNB5060, alc             |
| IP <sup>0</sup>                                            | IP <sup>0</sup>                             | IPI (HA35) IP2 (amber HA100) IP3 (amber HA9) |

| <b>Bacteria</b> |  | <b>Genotype</b>                                 |
|-----------------|--|-------------------------------------------------|
| DH10B           |  | F <sup>-</sup> mcrA $\Delta$ (mrr-hsdRMS-mcrBC) |
| CR63            |  | $\lambda$ -, serU60(AS), lamB63                 |
| B834            |  | hsdRB, hsdMb, Sup0, rgl+                        |
| K803            |  | rk-, mk-, rgl-, supE44                          |
