# Supplementary material for: Covalent Modification of Bacteriophage T4 DNA Inhibits CRISPR-Cas9
Source: PubMed Central journal article supplement — mBio. 2015 Jun 16;6(3):e00648-15. doi: 10.1128/mBio.00648-15 (PMC4471564; doi:10.1128/mbio.00648-15), 2015-06-16
Supplement: mbo003152354st2.pdf [file mbo003152354st2.pdf]

**Table S2. Oligonucleotides used in this study**

| Oligo Name                   | Oligo DNA sequence 5'-3'                 | Function                                              | Source                         |
|------------------------------|------------------------------------------|-------------------------------------------------------|--------------------------------|
| T4_Top_70718_70747           | AAACAAAAGTTTTAGGGAATTCTAGGGCGGAGAGG      | top oligo for cloning T4 spacer 1 into pCRISPR        | this study                     |
| T4_Bottom_70718_70747        | AAAACCTCTCCGCCCTAGAATTCCTAAAACCTTTT      | bottom oligo for cloning T4 spacer 1 into pCRISPR     | this study                     |
| T4_ModA_Top_13205_13234      | AAACGCCAGGGAGCCCAAGGCGGAGGGTCAAGAG       | top oligo for cloning T4 spacer 2 into pCRISPR        | this study                     |
| T4_ModA_Bottom_13205_13234   | AAAACCTTGACCTCCGCCCTGGGCTCCCTGGGC        | bottom oligo for cloning T4 spacer 2 into pCRISPR     | this study                     |
| T4_30.2_top_127687_127716    | AAACTTCACTATCAAACCTTTCTTTATTTTCCTTG      | top oligo for cloning T4 spacer 3 into pCRISPR        | this study                     |
| T4_30.2_bottom_127687_127716 | AAAACAAGGAAAATAAAGAAAGTTTTGATAGTGAA      | bottom oligo for cloning T4 spacer 3 into pCRISPR     | this study                     |
| T4_Top_116439_116468         | AAACTTTATTATCATATTTATAAATAGAATAAAG       | top oligo for cloning T4 spacer 4 into pCRISPR        | this study                     |
| T4_Bottom_116439_116468      | AAAACCTTTATCTATTTATAAATATGATAAATAAA      | bottom oligo for cloning T4 spacer 4 into pCRISPR     | this study                     |
| Church1_top_pCRISPR          | AAACATATCGAAAGCAATCAGGTTG                | top oligo for cloning T4 spacer C1 into pCRISPR       | adapted from Yaung et al. 2014 |
| Church1_bottom_pCRISPR       | AAAACAACCTGATTGCTTTTCGATAT               | bottom oligo for cloning T4 spacer C1 into pCRISPR    | adapted from Yaung et al. 2014 |
| Church2_top_pCRISPR          | AAACAAGAAGCTTCCAACCGGTAATG               | top oligo for cloning T4 spacer C2 into pCRISPR       | adapted from Yaung et al. 2014 |
| Church2_bottom_pCRISPR       | AAAACATTACCGGTTGGAAGTTCTT                | bottom oligo for cloning T4 spacer C2 into pCRISPR    | adapted from Yaung et al. 2014 |
| Church3_top_pCRISPR          | AAACGATGCTGATGCTGAACTGTCTG               | top oligo for cloning T4 spacer C3 into pCRISPR       | adapted from Yaung et al. 2014 |
| Church3_bottom_pCRISPR       | AAAACGACAGTTCAGCATCAGCATC                | bottom oligo for cloning T4 spacer C3 into pCRISPR    | adapted from Yaung et al. 2014 |
| 70_puc19_top                 | AATTCAAAAGTTTTAGGGAATTCTAGGGCGGAGAGGGGA  | top oligo for cloning T4 protospacer 1 into puc19     | this study                     |
| 70_puc19_bottom              | AGCTTCCCCTCTCCGCCCTAGAATTCCTAAAACCTTTG   | bottom oligo for cloning T4 protospacer 1 into puc19  | this study                     |
| ModA_puc19_top               | AATTCGCCAGGGAGCCCAAGGCGGAGGGTCAAGATGGA   | top oligo for cloning T4 protospacer 2 into puc19     | this study                     |
| ModA_puc19_bottom            | AGCTTCCATCTTGACCTCCGCCCTGGGCTCCCTGGGCG   | bottom oligo for cloning T4 protospacer 2 into puc19  | this study                     |
| 30.2_puc19_top               | AATCTTCACTATCAAACCTTTCTTTATTTTCCTTTGGA   | top oligo for cloning T4 protospacer 3 into puc19     | this study                     |
| 30.2_puc19_bottom            | AGCTTCCAAAGGAAAATAAAGAAAGTTTTGATAGTGAAG  | bottom oligo for cloning T4 protospacer 3 into puc19  | this study                     |
| 11_puc19_top                 | AATCTTTATTTATCATATTTATAAATAGAATAAAAGGA   | top oligo for cloning T4 protospacer 4 into puc19     | this study                     |
| 11_puc19_bottom              | AGCTTCTTTTATTCTATTTATAAATATGATAAATAAAG   | bottom oligo for cloning T4 protospacer 4 into puc19  | this study                     |
| 30_Church1_top_puc19         | AATCAACACCACAAATATCGAAAGCAATCAGGTTAGGA   | top oligo for cloning T4 protospacer C1 into puc19    | adapted from Yaung et al. 2014 |
| 30_Church1_bottom_puc19      | AGCTTCCCTAACCTGATTGCTTTTCGATATTTGTGGTGTG | bottom oligo for cloning T4 protospacer C1 into puc19 | adapted from Yaung et al. 2014 |
| 30_Church2_top_puc19         | AATCTTCCGATCCGAAGAACTTCCAACCGGTAATGGGA   | top oligo for cloning T4 protospacer C2 into puc19    | adapted from Yaung et al. 2014 |
| 30_Church2_bottom_puc19      | AGCTTCCCATTACCGGTTGGAAGTTCTTCGGATCGGAAG  | bottom oligo for cloning T4 protospacer C2 into puc19 | adapted from Yaung et al. 2014 |
| 30_Church3_top_puc19         | AATCTCACGGTATGGATGCTGATGCTGAACTGTCTGGA   | top oligo for cloning T4 protospacer C3 into puc19    | adapted from Yaung et al. 2014 |
| 30_Church3_bottom_puc19      | AGCTTCCAGACAGTTCAGCATCAGCATCCATACCGTGAG  | bottom oligo for cloning T4 protospacer C3 into puc19 | adapted from Yaung et al. 2014 |
