# Supplementary figures and images for: Covalent Modification of Bacteriophage T4 DNA Inhibits CRISPR-Cas9
Source: PubMed Central journal article supplement — mBio. 2015 Jun 16;6(3):e00648-15. doi: 10.1128/mBio.00648-15 (PMC4471564; doi:10.1128/mbio.00648-15), 2015-06-16

# Figure S1

## A Read Length

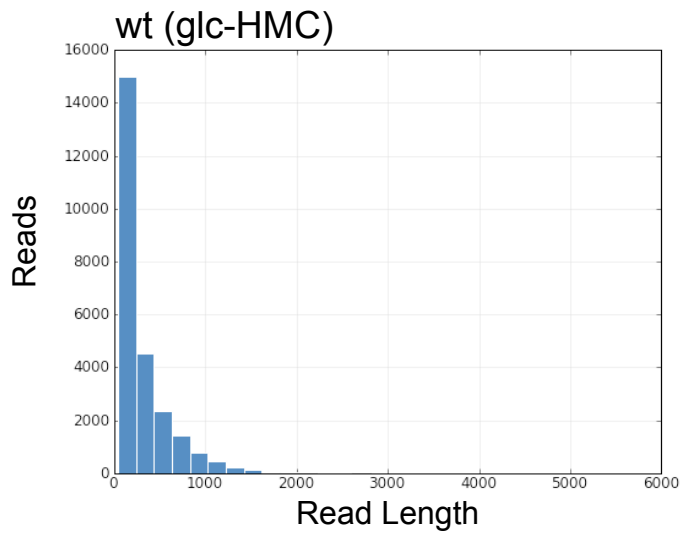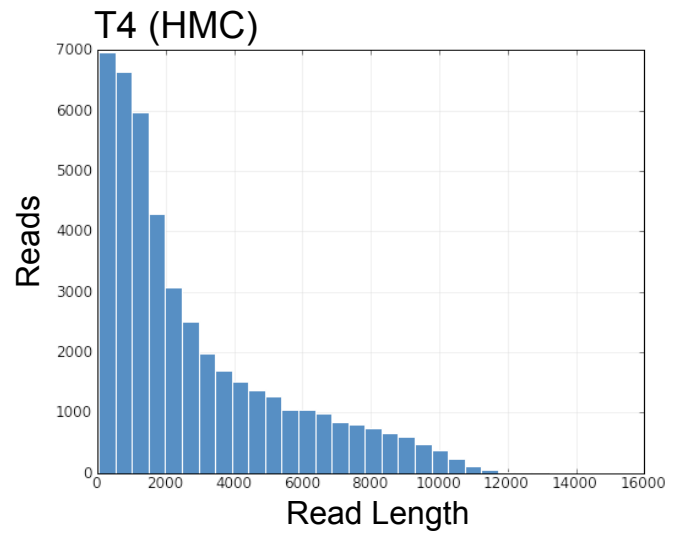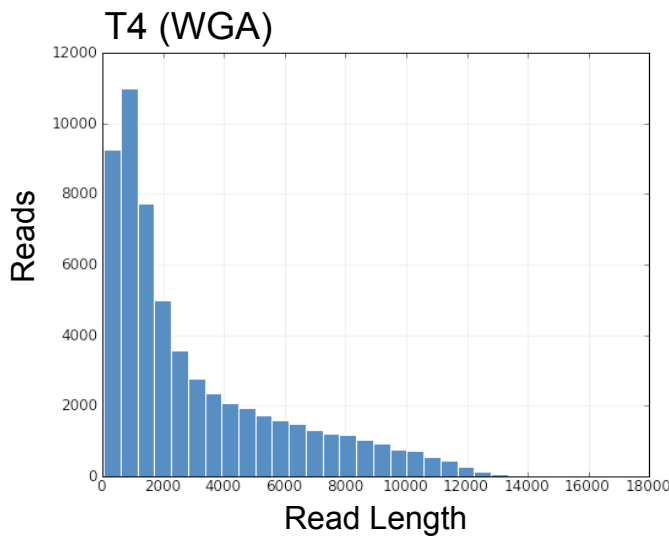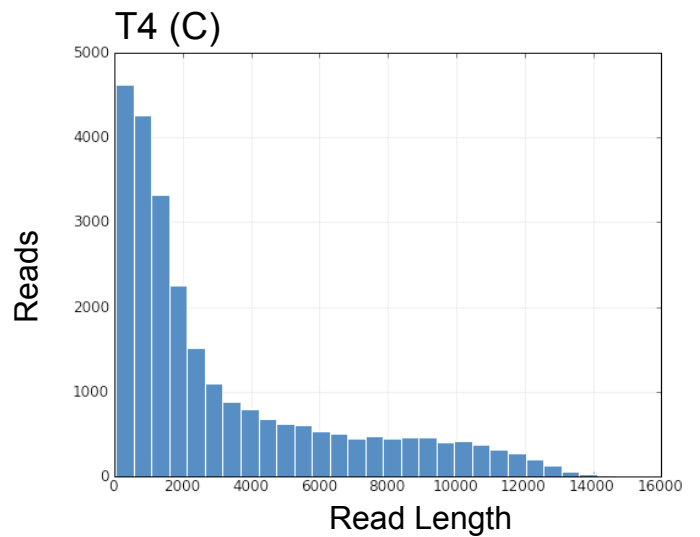

## B Mapped Subread Length

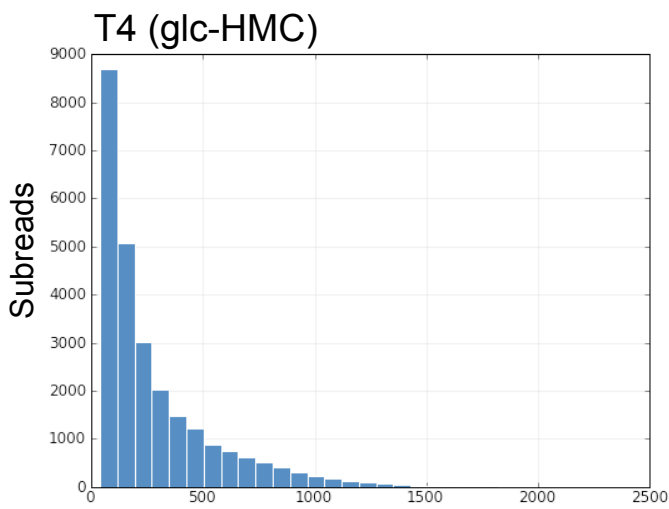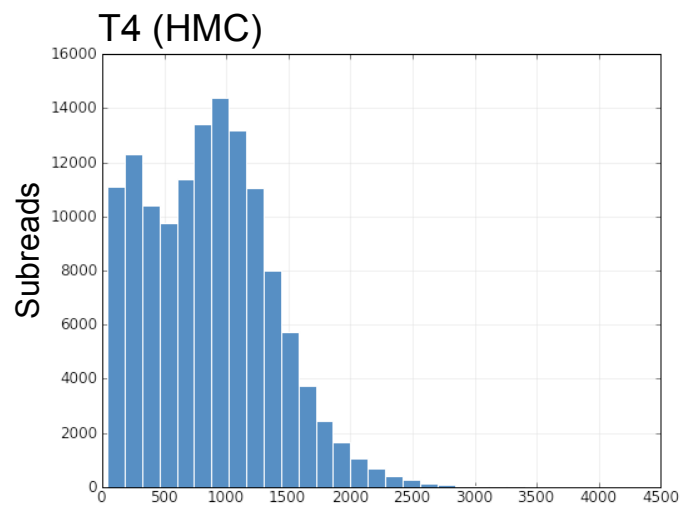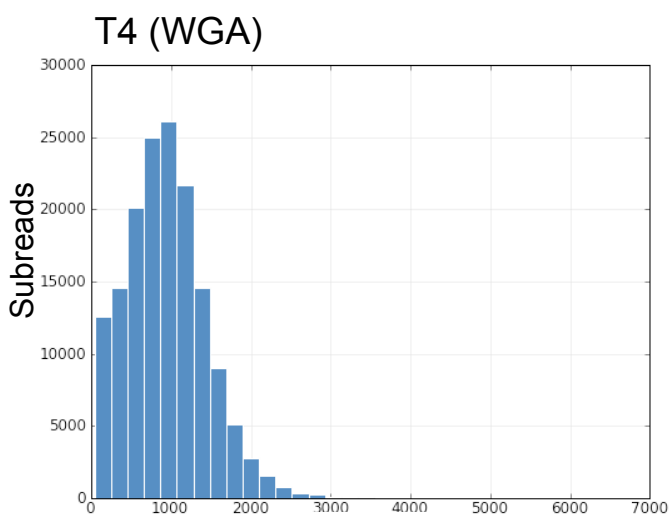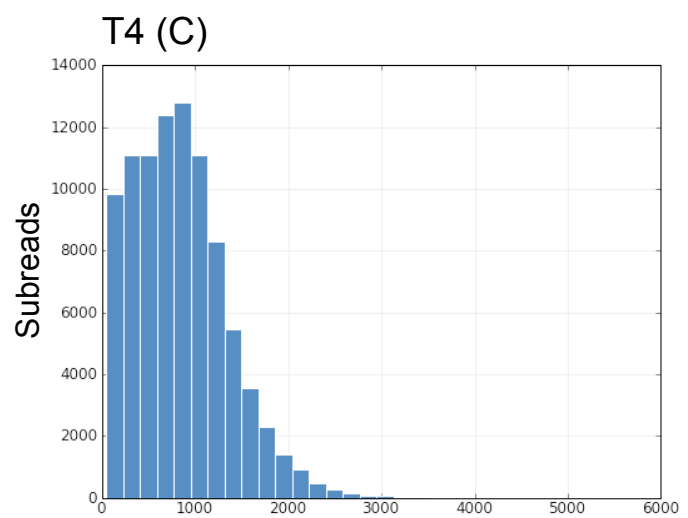

Supplement: mbo003152354sf1.pdf [file mbo003152354sf1.pdf]

**Figure S2**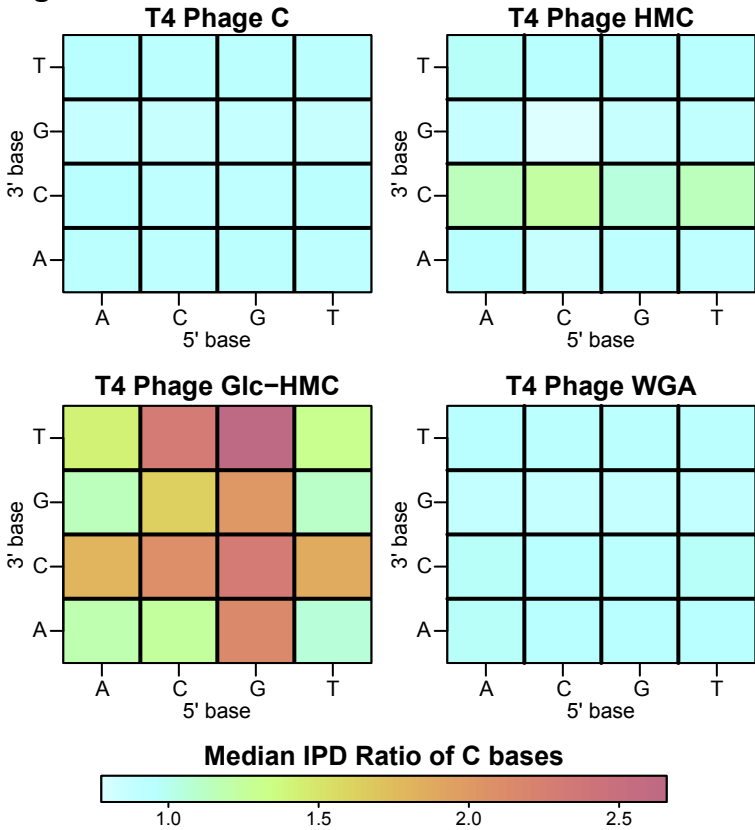

Supplement: mbo003152354sf2.pdf [file mbo003152354sf2.pdf]

# Figure S3

sequence coverage

seq  
data

T4 (glc-HMC)

T4 (HMC)

T4 (C)

T4 (WGA)

T4

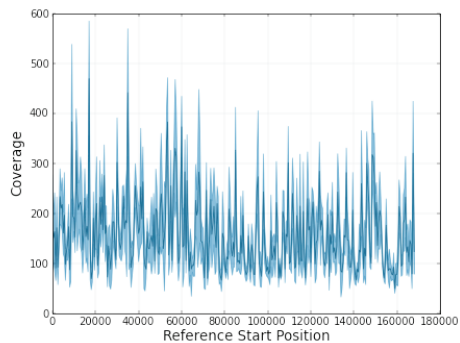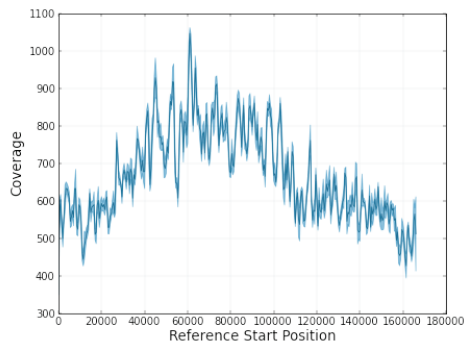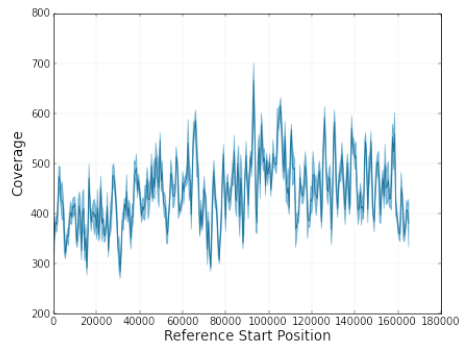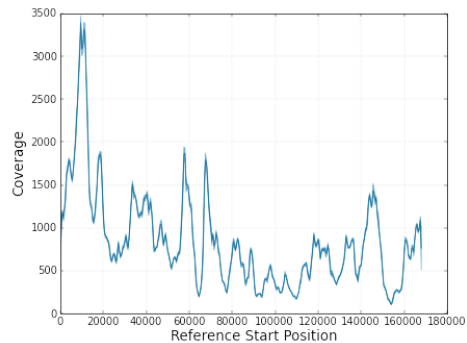

E. coli

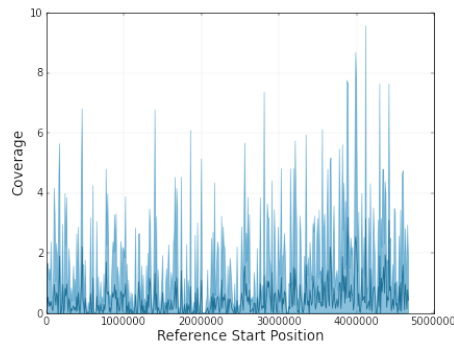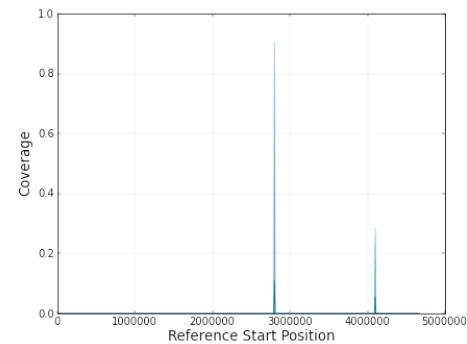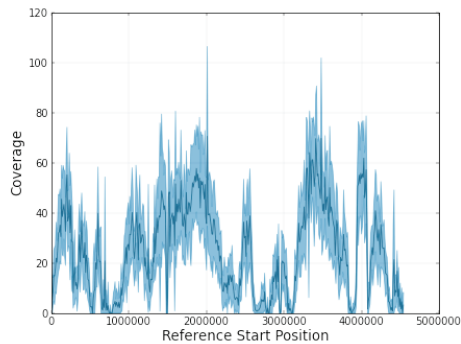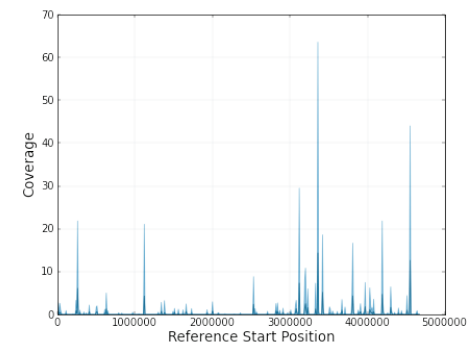

Supplement: mbo003152354sf3.pdf [file mbo003152354sf3.pdf]

**Figure S4**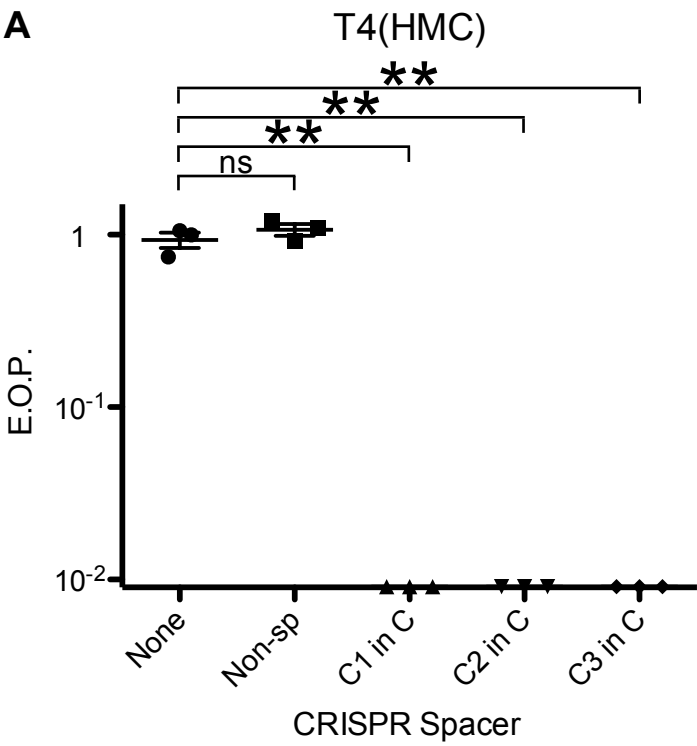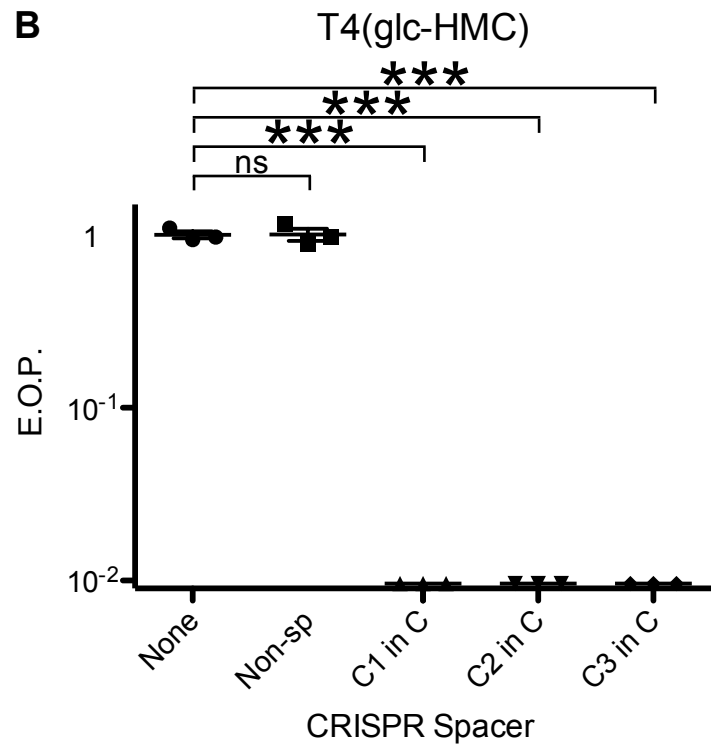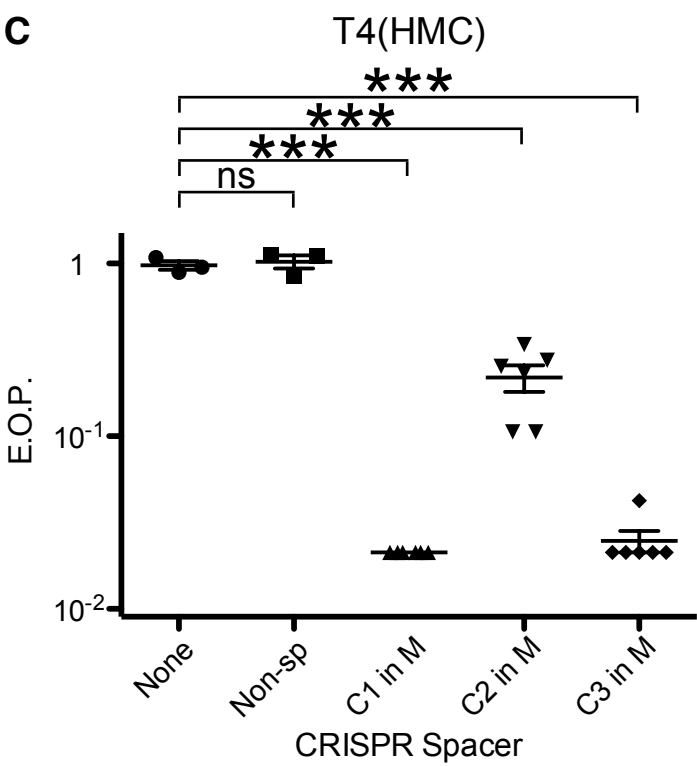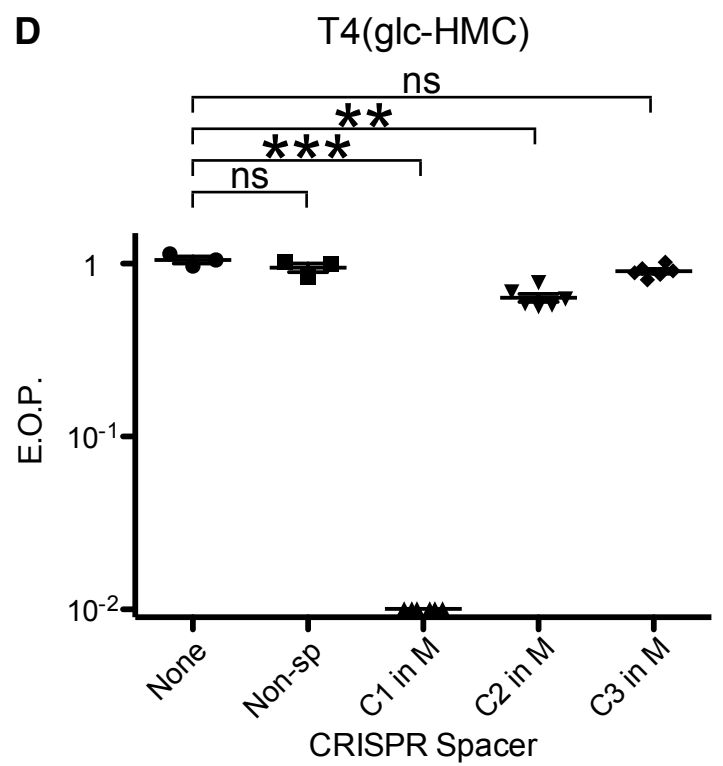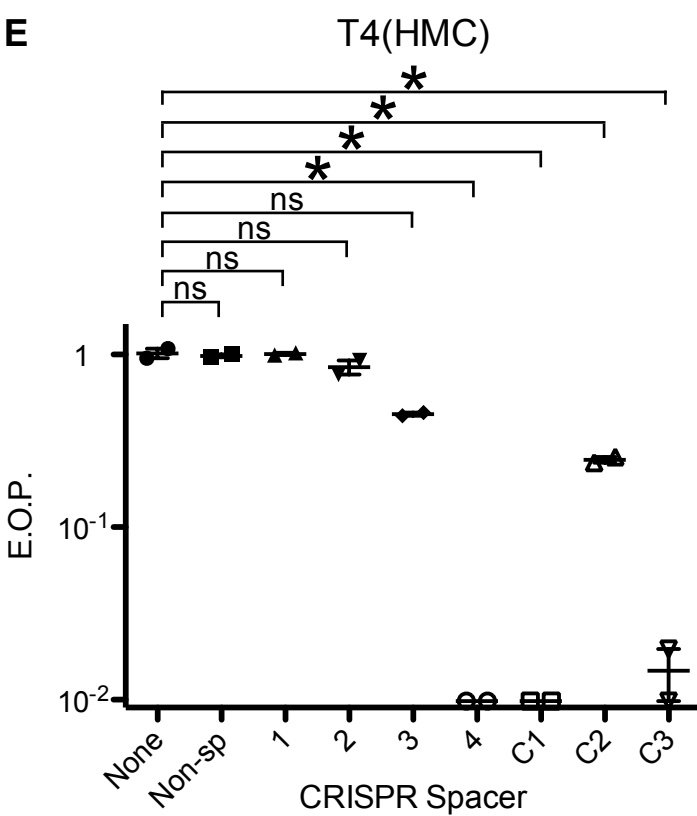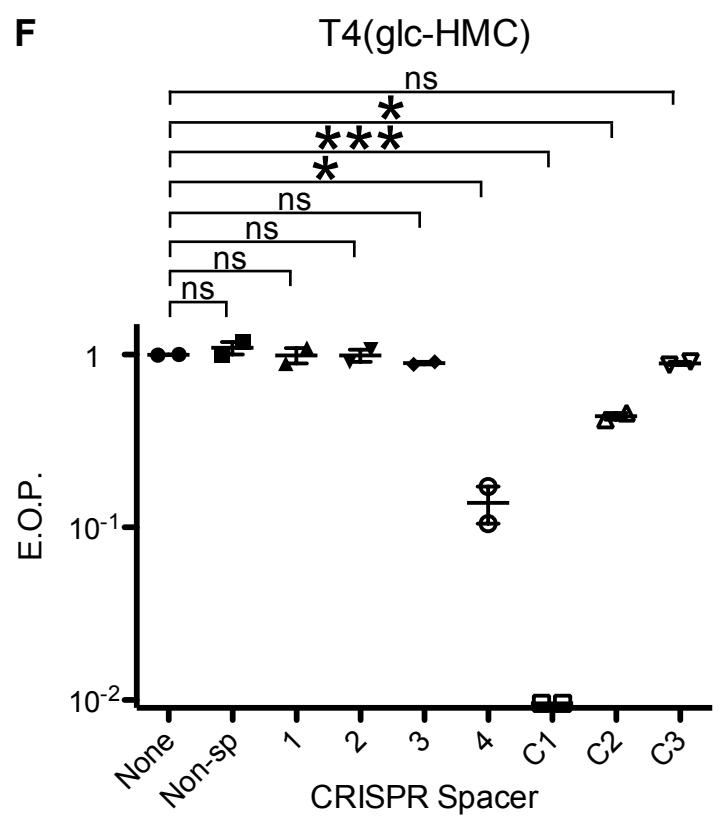

Supplement: mbo003152354sf4.pdf [file mbo003152354sf4.pdf]

**Figure S5****Plasmid Transformation**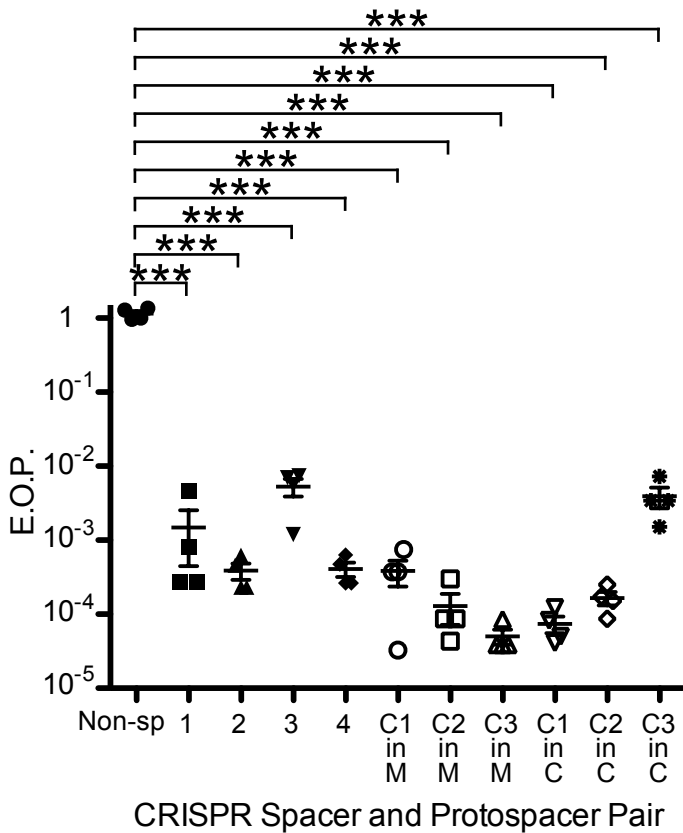

Supplement: mbo003152354sf5.pdf [file mbo003152354sf5.pdf]

**Figure S6**

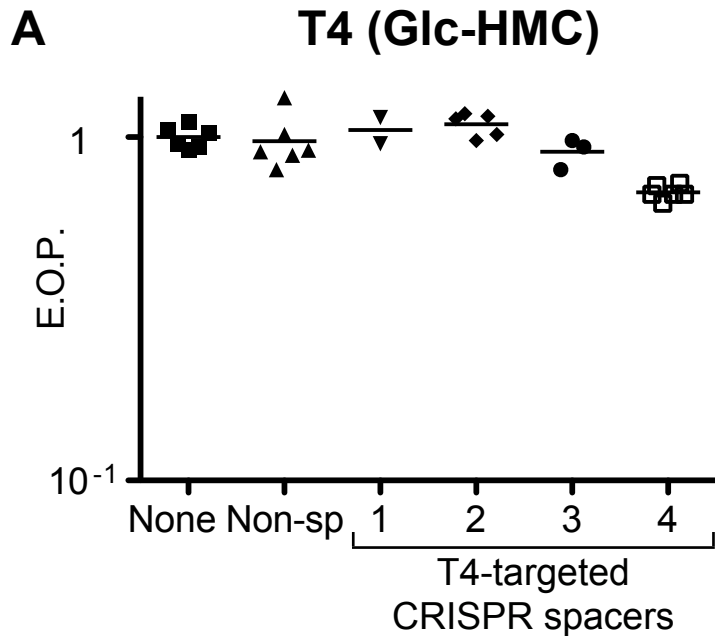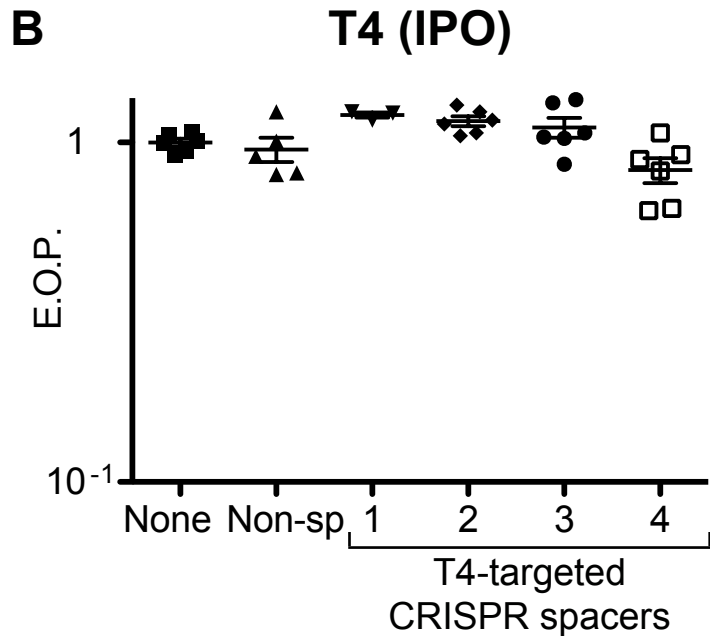

Supplement: mbo003152354sf6.pdf [file mbo003152354sf6.pdf]

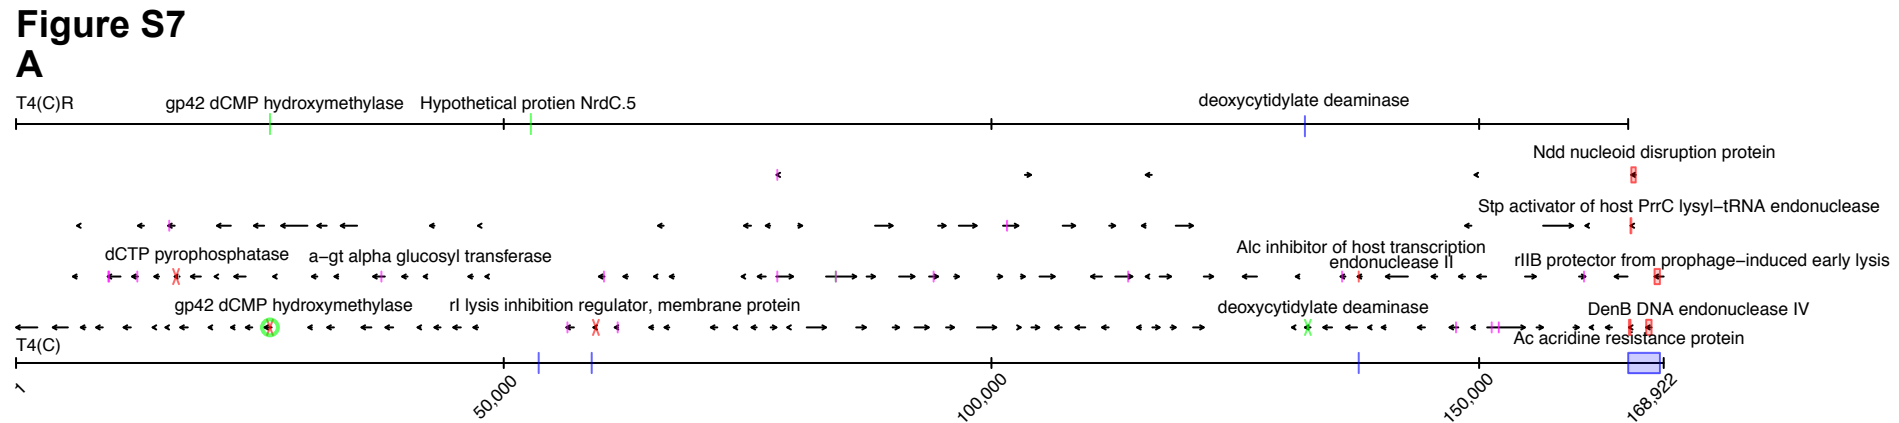

#### B Glycosylated Hydroxymethylcytosine Synthesis

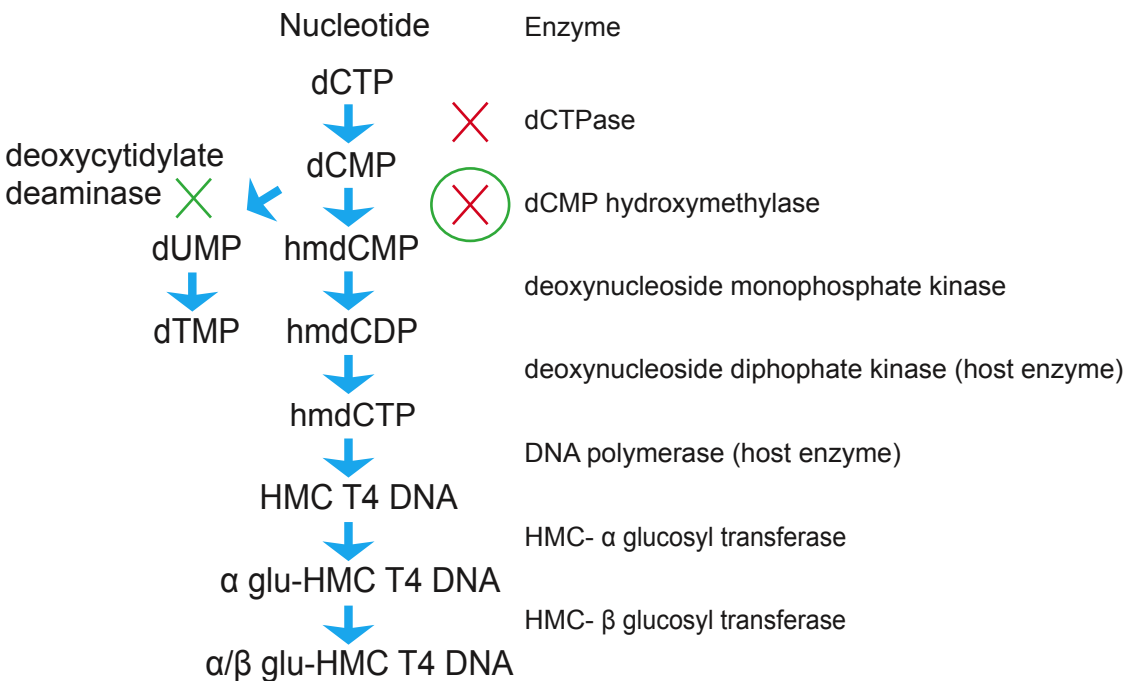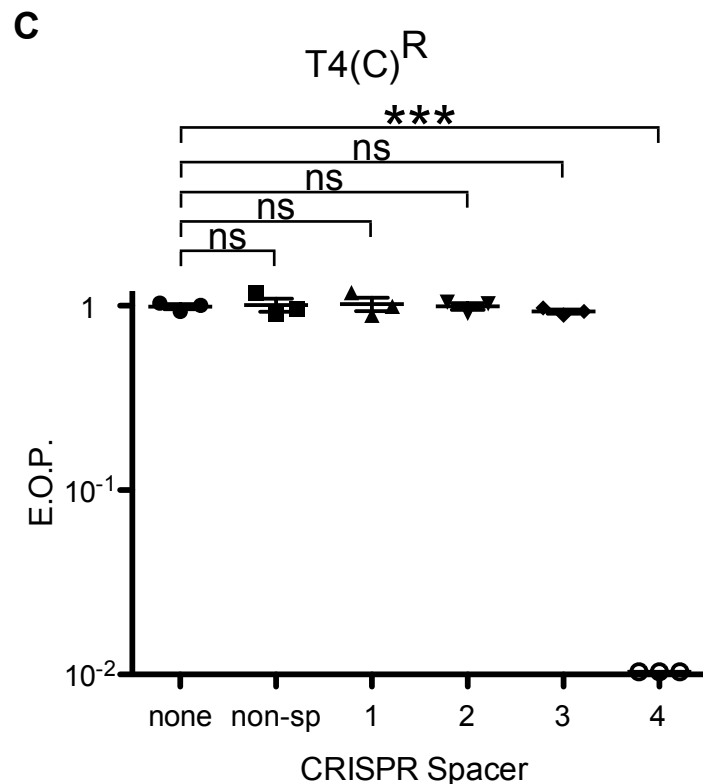

Supplement: mbo003152354sf7.pdf [file mbo003152354sf7.pdf]
